# Supplementary material for: Predictors of mental health during the Covid-19 pandemic in the US: Role of economic concerns, health worries and social distancing
Source: PubMed Central journal article supplement (PMC7657497; doi:10.1371/journal.pone.0241895), 2020-11-11
Supplement: pone.0241895.s006.pdf [file pone.0241895.s006.pdf]

**S2 Table. Differences between UAS responders and non-responders**

|                             | Population means |                | $\chi^2$ | p-value |
|-----------------------------|------------------|----------------|----------|---------|
|                             | Responders       | Non-responders |          |         |
| Male                        | 0.489            | 0.463          | 1.926    | 0.165   |
| Age                         | 48.448           | 47.797         | 0.965    | 0.326   |
| Less than high school       | 0.084            | 0.096          | 1.107    | 0.293   |
| High school graduate or GED | 0.296            | 0.299          | 0.015    | 0.901   |
| Some college (no degree)    | 0.277            | 0.279          | 0.018    | 0.894   |
| College graduate and above  | 0.342            | 0.326          | 0.871    | 0.351   |
| White                       | 0.773            | 0.759          | 0.703    | 0.402   |
| Black                       | 0.125            | 0.138          | 0.938    | 0.333   |
| Other                       | 0.102            | 0.103          | 0.004    | 0.947   |
| Currently married           | 0.557            | 0.512          | 5.659    | 0.017   |

*Notes:* Source of Data: “Understand America Study” (UAS), survey 230, collected between March 10 and March 31, 2020. We use sample weights to make the survey representative of the U.S. population aged 18 and older. Difference in age was assessed using a t-test and the number in column 4 corresponds to the F-value.
