# Supplementary material for: Predictors of mental health during the Covid-19 pandemic in the US: Role of economic concerns, health worries and social distancing
Source: PubMed Central journal article supplement (PMC7657497; doi:10.1371/journal.pone.0241895), 2020-11-11
Supplement: pone.0241895.s007.pdf [file pone.0241895.s007.pdf]

**S3 Table. Associations with Covid-19 cases and related number of deaths and mental health score (PhQ-4) - Average marginal effects**

|                              | PhQ-4 categories             |                           |                           |                           |
|------------------------------|------------------------------|---------------------------|---------------------------|---------------------------|
|                              | None                         | Mild                      | Moderate                  | Severe                    |
| Number of cases in US (log)  | -0.026***<br>[-0.040,-0.013] | 0.012***<br>[0.006,0.018] | 0.007***<br>[0.004,0.010] | 0.007***<br>[0.003,0.012] |
| Number of deaths in US (log) | -0.031***<br>[-0.046,-0.015] | 0.014***<br>[0.007,0.021] | 0.008***<br>[0.004,0.012] | 0.009***<br>[0.004,0.013] |

*Notes:* Average marginal effects resulting from weighted ordered probit regressions with robust confidence intervals clustered at the state level in brackets, \*  $p < 0.1$ , \*\*  $p < 0.05$ , \*\*\*  $p < 0.01$ . The number of cases and deaths in the US is transformed using log. Specifications include state fixed effects. The list of control variables includes: sex, age and age<sup>2</sup>, educational level (binary variable for each category), race and whether the respondent was married at the time of the interview. We control for depression level characteristics prior to the Covid-19 pandemic, along with the year and month when this measure was collected. We use sample weights to make the survey representative of the U.S. population aged 18 and older. Data source: “Understanding America Study” (UAS) collected between March 10 and March 31, 2020.
