# Supplementary material for: Predictors of mental health during the Covid-19 pandemic in the US: Role of economic concerns, health worries and social distancing
Source: PLoS One. 2020 Nov 11;15(11):e0241895. doi: 10.1371/journal.pone.0241895 (PMC7657497; doi:10.1371/journal.pone.0241895)
Supplement: S1 Table — (PDF) [file pone.0241895.s005.pdf]

**S1 Table. Descriptive statistics - additional variables**

|                                               | Pop. mean | Pop. std. deviation |
|-----------------------------------------------|-----------|---------------------|
| Male                                          | 0.489     | 0.500               |
| Age                                           | 48.429    | 16.583              |
| Less than high school                         | 0.086     | 0.280               |
| High school graduate or GED                   | 0.297     | 0.457               |
| Some college (no degree)                      | 0.277     | 0.447               |
| College graduate and above                    | 0.341     | 0.474               |
| White                                         | 0.772     | 0.420               |
| Black                                         | 0.126     | 0.332               |
| Other races                                   | 0.102     | 0.302               |
| Currently married                             | 0.557     | 0.497               |
| Hardware (internet-connected tablet) provided | 0.044     | 0.205               |

*Notes:* Data source: “Understand America Study” (UAS), survey 230, collected between March 10 and March 31, 2020. We use sample weights to make the survey representative of the U.S. population aged 18 and older. “Pop.” is short for population and “std.” is short for standard.
